# Supplementary material for: IL-6 and cfDNA monitoring throughout COVID-19 hospitalization are accurate markers of its outcomes
Source: Springer Nature journal article supplement (doi:10.1186/s12931-023-02426-1), 2023-05-05
Supplement: MOESM15 [file 25324448]

TABLE 1 CASE GROUP

## DATA OF AFFILIATION AND MEDICAL BACKGROUND

| patient | AGE | SEX | DEATH (1/0) | > 60 YEARS (1/0) | ARTERIAL HYPERTENSION (1/0) | Diabetes (1/0) | Obesity (1/0) | HEART DISEASE (1/0) | BRONCHOPULMONOPATHY (1/0) | LIVER DISEASE (1/0) | RENAL INSUFFICIENCY (1/0) | DEMENCIA (1/0) | DYSLIPEMIA (1/0) |
|---------|-----|-----|-------------|------------------|-----------------------------|----------------|---------------|---------------------|---------------------------|---------------------|---------------------------|----------------|------------------|
| 1       | 57  | F   | 0           | 0                | 0                           | 0              | 0             | 0                   | 0                         | 0                   | 0                         | 0              | 1                |
| 2       | 52  | F   | 0           | 0                | 0                           | 0              | 0             | 0                   | 0                         | 0                   | 0                         | 0              | 0                |
| 3       | 67  | F   | 1           | 1                | 1                           | 0              | 1             | 0                   | 1                         | 0                   | 0                         | 0              | 1                |
| 4       | 58  | F   | 0           | 0                | 1                           | 0              | 0             | 0                   | 0                         | 0                   | 0                         | 0              | 0                |
| 5       | 63  | F   | 0           | 1                | 0                           | 0              | 0             | 0                   | 0                         | 0                   | 0                         | 0              | 1                |
| 6       | 49  | M   | 0           | 0                | 0                           | 0              | 0             | 0                   | 0                         | 0                   | 0                         | 0              | 0                |
| 7       | 54  | F   | 0           | 0                | 0                           | 0              | 0             | 0                   | 1                         | 0                   | 0                         | 0              | 0                |
| 8       | 55  | M   | 0           | 0                | 0                           | 1              | 0             | 0                   | 0                         | 0                   | 0                         | 0              | 1                |
| 9       | 48  | M   | 0           | 0                | 1                           | 0              | 0             | 0                   | 0                         | 0                   | 0                         | 0              | 0                |
| 10      | 70  | M   | 0           | 1                | 0                           | 1              | 0             | 0                   | 0                         | 0                   | 0                         | 0              | 0                |
| 11      | 75  | M   | 1           | 1                | 1                           | 0              | 0             | 0                   | 1                         | 0                   | 0                         | 0              | 0                |
| 12      | 72  | F   | 1           | 1                | 1                           | 0              | 1             | 1                   | 0                         | 0                   | 0                         | 0              | 0                |
| 13      | 62  | M   | 0           | 1                | 0                           | 0              | 0             | 1                   | 0                         | 0                   | 0                         | 0              | 0                |
| 14      | 88  | F   | 0           | 1                | 1                           | 1              | 0             | 0                   | 0                         | 0                   | 0                         | 0              | 1                |
| 15      | 76  | F   | 0           | 1                | 1                           | 0              | 0             | 0                   | 0                         | 0                   | 0                         | 1              | 1                |
| 16      | 88  | F   | 1           | 1                | 1                           | 0              | 0             | 0                   | 1                         | 0                   | 0                         | 0              | 0                |
| 17      | 76  | M   | 0           | 1                | 0                           | 0              | 0             | 0                   | 0                         | 0                   | 0                         | 0              | 0                |
| 18      | 86  | M   | 0           | 1                | 0                           | 1              | 0             | 1                   | 1                         | 0                   | 0                         | 1              | 0                |
| 19      | 26  | F   | 0           | 0                | 0                           | 0              | 0             | 0                   | 0                         | 0                   | 0                         | 0              | 0                |
| 20      | 74  | F   | 0           | 0                | 0                           | 0              | 0             | 0                   | 0                         | 0                   | 0                         | 1              | 0                |
| 21      | 56  | F   | 0           | 0                | 1                           | 1              | 0             | 1                   | 1                         | 0                   | 0                         | 0              | 1                |
| 22      | 81  | F   | 0           | 1                | 0                           | 0              | 0             | 0                   | 0                         | 0                   | 0                         | 1              | 1                |
| 23      | 33  | F   | 0           | 0                | 0                           | 0              | 0             | 0                   | 0                         | 0                   | 0                         | 0              | 1                |
| 24      | 77  | M   | 1           | 1                | 1                           | 0              | 0             | 0                   | 1                         | 0                   | 0                         | 0              | 0                |
| 25      | 79  | M   | 0           | 1                | 0                           | 1              | 0             | 0                   | 0                         | 0                   | 0                         | 0              | 0                |
| 26      | 72  | F   | 0           | 1                | 0                           | 0              | 0             | 0                   | 0                         | 0                   | 0                         | 0              | 0                |
| 27      | 68  | M   | 0           | 1                | 1                           | 0              | 0             | 0                   | 0                         | 0                   | 1                         | 0              | 0                |
| 28      | 78  | M   | 1           | 1                | 1                           | 1              | 0             | 1                   | 1                         | 0                   | 0                         | 0              | 0                |
| 29      | 35  | F   | 0           | 0                | 0                           | 0              | 0             | 0                   | 0                         | 0                   | 0                         | 0              | 0                |
| 30      | 47  | F   | 0           | 0                | 0                           | 0              | 0             | 0                   | 0                         | 0                   | 0                         | 0              | 0                |
| 31      | 46  | F   | 0           | 0                | 0                           | 0              | 0             | 0                   | 0                         | 0                   | 0                         | 0              | 0                |
| 32      | 66  | M   | 0           | 1                | 1                           | 0              | 0             | 1                   | 0                         | 0                   | 1                         | 1              | 0                |
| 33      | 75  | F   | 0           | 1                | 1                           | 1              | 1             | 0                   | 1                         | 0                   | 0                         | 0              | 1                |
| 34      | 71  | F   | 0           | 1                | 1                           | 0              | 0             | 0                   | 0                         | 0                   | 0                         | 0              | 0                |
| 35      | 63  | F   | 0           | 1                | 0                           | 0              | 0             | 0                   | 0                         | 0                   | 0                         | 0              | 0                |
| 36      | 69  | F   | 0           | 1                | 0                           | 0              | 0             | 0                   | 0                         | 0                   | 0                         | 1              | 0                |
| 37      | 55  | F   | 0           | 0                | 0                           | 1              | 0             | 0                   | 0                         | 0                   | 0                         | 0              | 0                |
| 38      | 64  | M   | 0           | 1                | 1                           | 1              | 0             | 0                   | 0                         | 0                   | 0                         | 0              | 0                |
| 39      | 61  | M   | 0           | 1                | 0                           | 0              | 0             | 1                   | 0                         | 0                   | 1                         | 0              | 0                |
| 40      | 51  | F   | 0           | 0                | 0                           | 0              | 0             | 0                   | 0                         | 0                   | 0                         | 0              | 0                |
| 41      | 53  | M   | 0           | 0                | 0                           | 0              | 0             | 0                   | 0                         | 0                   | 0                         | 0              | 0                |
| 42      | 48  | M   | 0           | 0                | 0                           | 0              | 0             | 0                   | 0                         | 0                   | 0                         | 0              | 0                |
| 43      | 79  | M   | 1           | 1                | 0                           | 1              | 0             | 0                   | 0                         | 0                   | 0                         | 1              | 0                |
| 44      | 77  | M   | 0           | 1                | 1                           | 1              | 0             | 0                   | 0                         | 0                   | 0                         | 0              | 0                |
| 45      | 84  | F   | 0           | 1                | 1                           | 1              | 1             | 0                   | 0                         | 0                   | 0                         | 0              | 0                |
| 46      | 83  | M   | 0           | 1                | 1                           | 0              | 0             | 0                   | 0                         | 0                   | 0                         | 1              | 1                |
| 47      | 68  | F   | 1           | 1                | 0                           | 0              | 0             | 0                   | 0                         | 0                   | 0                         | 0              | 0                |
| 48      | 33  | F   | 0           | 0                | 0                           | 0              | 0             | 0                   | 0                         | 0                   | 0                         | 0              | 0                |
| 49      | 76  | F   | 0           | 1                | 1                           | 0              | 0             | 1                   | 0                         | 0                   | 0                         | 1              | 0                |
| 50      | 85  | F   | 0           | 1                | 0                           | 0              | 0             | 1                   | 1                         | 0                   | 0                         | 1              | 0                |
| 51      | 78  | M   | 0           | 1                | 1                           | 1              | 0             | 0                   | 0                         | 0                   | 0                         | 1              | 0                |
| 52      | 79  | F   | 1           | 1                | 1                           | 0              | 0             | 0                   | 0                         | 0                   | 0                         | 1              | 0                |
| 53      | 77  | M   | 0           | 1                | 1                           | 1              | 0             | 1                   | 0                         | 0                   | 0                         | 1              | 1                |
| 54      | 72  | M   | 0           | 1                | 1                           | 1              | 0             | 1                   | 0                         | 0                   | 0                         | 0              | 0                |
| 55      | 82  | F   | 0           | 1                | 1                           | 1              | 1             | 0                   | 0                         | 0                   | 1                         | 0              | 0                |
| 56      | 56  | F   | 0           | 0                | 0                           | 0              | 0             | 0                   | 1                         | 0                   | 0                         | 0              | 0                |
| 57      | 43  | M   | 0           | 0                | 0                           | 1              | 0             | 0                   | 0                         | 1                   | 0                         | 0              | 1                |
| 58      | 42  | F   | 0           | 0                | 0                           | 0              | 0             | 0                   | 0                         | 0                   | 0                         | 0              | 0                |
| 59      | 68  | M   | 1           | 1                | 1                           | 0              | 0             | 0                   | 0                         | 0                   | 0                         | 0              | 1                |
| 60      | 59  | F   | 0           | 0                | 1                           | 1              | 1             | 0                   | 0                         | 0                   | 0                         | 0              | 1                |
| 61      | 85  | F   | 0           | 1                | 1                           | 0              | 0             | 0                   | 0                         | 0                   | 0                         | 1              | 0                |
| 62      | 37  | M   | 0           | 0                | 0                           | 0              | 0             | 0                   | 0                         | 0                   | 0                         | 0              | 0                |
| 63      | 87  | M   | 1           | 1                | 1                           | 0              | 0             | 0                   | 1                         | 0                   | 1                         | 1              | 0                |
| 64      | 86  | M   | 0           | 1                | 1                           | 1              | 0             | 0                   | 0                         | 1                   | 0                         | 0              | 0                |
| 65      | 71  | M   | 0           | 1                | 1                           | 1              | 0             | 0                   | 0                         | 0                   | 0                         | 0              | 1                |
| 66      | 87  | M   | 0           | 1                | 0                           | 0              | 0             | 1                   | 1                         | 0                   | 0                         | 1              | 0                |
| 67      | 36  | M   | 0           | 0                | 0                           | 0              | 0             | 0                   | 0                         | 0                   | 0                         | 0              | 0                |
| 68      | 40  | F   | 0           | 0                | 0                           | 0              | 0             | 0                   | 0                         | 0                   | 0                         | 0              | 0                |
| 69      | 80  | F   | 0           | 1                | 1                           | 1              | 0             | 0                   | 0                         | 1                   | 0                         | 0              | 0                |
| 70      | 60  | F   | 0           | 1                | 1                           | 0              | 0             | 0                   | 0                         | 0                   | 0                         | 0              | 0                |
| 71      | 76  | M   | 0           | 1                | 1                           | 0              | 0             | 0                   | 0                         | 0                   | 0                         | 0              | 0                |
| 72      | 87  | F   | 0           | 1                | 1                           | 1              | 0             | 0                   | 0                         | 0                   | 0                         | 0              | 0                |
| 73      | 82  | F   | 0           | 1                | 0                           | 1              | 0             | 0                   | 1                         | 0                   | 0                         | 1              | 0                |
| 74      | 49  | F   | 0           | 0                | 0                           | 0              | 0             | 0                   | 0                         | 0                   | 0                         | 0              | 0                |
| 75      | 41  | F   | 0           | 0                | 0                           | 0              | 1             | 0                   | 0                         | 0                   | 0                         | 0              | 0                |
| 76      | 80  | F   | 0           | 1                | 1                           | 0              | 0             | 0                   | 1                         | 0                   | 0                         | 1              | 0                |
| 77      | 83  | M   | 0           | 1                | 1                           | 1              | 0             | 0                   | 0                         | 0                   | 1                         | 0              | 0                |
| 78      | 86  | F   | 1           | 1                | 0                           | 0              | 0             | 0                   | 0                         | 1                   | 0                         | 0              | 0                |
| 79      | 29  | F   | 0           | 0                | 0                           | 0              | 0             | 0                   | 0                         | 0                   | 0                         | 0              | 0                |
| 80      | 93  | M   | 1           | 1                | 1                           | 0              | 0             | 1                   | 0                         | 0                   | 0                         | 0              | 0                |
| 81      | 58  | M   | 0           | 0                | 1                           | 0              | 0             | 0                   | 0                         | 0                   | 0                         | 0              | 0                |
| 82      | 76  | M   | 1           | 1                | 1                           | 0              | 1             | 0                   | 0                         | 0                   | 0                         | 0              | 1                |
| 83      | 56  | M   | 1           | 0                | 0                           | 0              | 0             | 0                   | 0                         | 0                   | 0                         | 0              | 0                |
| 84      | 53  | F   | 1           | 0                | 0                           | 0              | 1             | 0                   | 0                         | 0                   | 0                         | 0              | 0                |





|  | NEUMONIA (1/0) | Pulmonary infiltrates in >50% of radiological fields | ARDS diffuse pattern |
|--|----------------|------------------------------------------------------|----------------------|
|--|----------------|------------------------------------------------------|----------------------|

|    |   |   |   |
|----|---|---|---|
| 1  | 1 | 1 | 0 |
| 2  | 1 | 0 | 0 |
| 3  | 1 | 0 | 0 |
| 4  | 1 | 1 | 0 |
| 5  | 1 | 0 | 0 |
| 6  | 1 | 0 | 0 |
| 7  | 1 | 0 | 0 |
| 8  | 1 | 1 | 0 |
| 9  | 1 | 0 | 0 |
| 10 | 1 | 0 | 0 |
| 11 | 1 | 1 | 0 |
| 12 | 1 | 1 | 0 |
| 13 | 1 | 0 | 0 |
| 14 | 1 | 1 | 0 |
| 15 | 1 | 0 | 0 |
| 16 | 1 | 0 | 0 |
| 17 | 1 | 1 | 0 |
| 18 | 1 | 0 | 0 |
| 19 | 1 | 0 | 0 |
| 20 | 1 | 0 | 0 |
| 21 | 0 | 0 | 0 |
| 22 | 0 | 0 | 0 |
| 23 | 1 | 0 | 0 |
| 24 | 0 | 0 | 0 |
| 25 | 1 | 0 | 0 |
| 26 | 1 | 0 | 0 |
| 27 | 1 | 1 | 0 |
| 28 | 1 | 0 | 0 |
| 29 | 1 | 1 | 0 |
| 30 | 1 | 0 | 0 |
| 31 | 1 | 0 | 0 |
| 32 | 1 | 0 | 0 |
| 33 | 1 | 0 | 0 |
| 34 | 1 | 0 | 0 |
| 35 | 1 | 0 | 0 |
| 36 | 1 | 0 | 0 |
| 37 | 1 | 0 | 0 |
| 38 | 1 | 0 | 0 |
| 39 | 1 | 0 | 0 |
| 40 | 1 | 0 | 0 |
| 41 | 1 | 0 | 0 |
| 42 | 1 | 1 | 0 |
| 43 | 1 | 0 | 0 |
| 44 | 1 | 0 | 0 |
| 45 | 1 | 0 | 0 |
| 46 | 1 | 0 | 0 |
| 47 | 1 | 0 | 0 |

|    |   |   |   |
|----|---|---|---|
| 48 | 1 | 0 | 0 |
| 49 | 1 | 0 | 0 |
| 50 | 0 | 0 | 0 |
| 51 | 1 | 0 | 0 |
| 52 | 1 | 0 | 0 |
| 53 | 1 | 0 | 0 |
| 54 | 0 | 0 | 0 |
| 55 | 1 | 0 | 0 |
| 56 | 1 | 0 | 0 |
| 57 | 1 | 0 | 0 |
| 58 | 1 | 0 | 0 |
| 59 | 1 | 0 | 0 |
| 60 | 0 | 0 | 0 |
| 61 | 0 | 0 | 0 |
| 62 | 1 | 0 | 0 |
| 63 | 1 | 0 | 0 |
| 64 | 1 | 0 | 0 |
| 65 | 1 | 0 | 0 |
| 66 | 0 | 0 | 0 |
| 67 | 0 | 0 | 0 |
| 68 | 1 | 0 | 0 |
| 69 | 1 | 0 | 0 |
| 70 | 1 | 0 | 0 |
| 71 | 1 | 0 | 0 |
| 72 | 0 | 0 | 0 |
| 73 | 1 | 0 | 0 |
| 74 | 1 | 0 | 0 |
| 75 | 1 | 0 | 0 |
| 76 | 0 | 0 | 0 |
| 77 | 0 | 0 | 0 |
| 78 | 1 | 0 | 0 |
| 79 | 1 | 0 | 0 |
| 80 | 0 | 0 | 0 |
| 81 | 1 | 0 | 0 |
| 82 | 1 | 0 | 0 |
| 83 | 1 | 1 | 0 |
| 84 | 1 | 1 | 1 |
| 85 | 1 | 1 | 0 |
| 86 | 1 | 1 | 0 |
| 87 | 1 | 1 | 0 |
| 88 | 1 | 1 | 1 |
| 89 | 1 | 1 | 1 |
| 90 | 1 | 0 | 0 |
| 91 | 1 | 0 | 0 |
| 92 | 1 | 1 | 0 |
| 93 | 1 | 1 | 0 |

|    | Test rápido de anticuerpos (1/0) | PCR SARS-COV-2 (0/1) |
|----|----------------------------------|----------------------|
| 1  | 0                                | 1                    |
| 2  | 0                                | 1                    |
| 3  | 0                                | 1                    |
| 4  | 0                                | 1                    |
| 5  | 0                                | 1                    |
| 6  | 0                                | 1                    |
| 7  | 0                                | 1                    |
| 8  | 0                                | 1                    |
| 9  | 0                                | 1                    |
| 10 | 0                                | 1                    |
| 11 | 0                                | 1                    |
| 12 | 0                                | 1                    |
| 13 | 0                                | 1                    |
| 14 | 0                                | 1                    |
| 15 | 0                                | 1                    |
| 16 | 0                                | 1                    |
| 17 | 0                                | 1                    |
| 18 | 0                                | 1                    |
| 19 | 0                                | 1                    |
| 20 | 0                                | 1                    |
| 21 | 0                                | 1                    |
| 22 | 0                                | 1                    |
| 23 | 0                                | 1                    |
| 24 | 0                                | 1                    |
| 25 | 0                                | 1                    |
| 26 | 0                                | 1                    |
| 27 | 0                                | 1                    |
| 28 | 0                                | 1                    |
| 29 | 0                                | 1                    |
| 30 | 1                                | 1                    |
| 31 | 0                                | 1                    |
| 32 | 0                                | 0                    |
| 33 | 0                                | 1                    |
| 34 | 0                                | 1                    |
| 35 | 0                                | 1                    |
| 36 | 0                                | 1                    |
| 37 | 0                                | 1                    |
| 38 | 0                                | 1                    |
| 39 | 0                                | 0                    |
| 40 | 1                                | 0                    |
| 41 | 0                                | 1                    |
| 42 | 0                                | 1                    |
| 43 | 0                                | 1                    |
| 44 | 0                                | 1                    |
| 45 | 0                                | 1                    |
| 46 | 0                                | 1                    |
| 47 | 0                                | 1                    |
| 48 | 0                                | 1                    |

|    |   |   |
|----|---|---|
| 49 | 0 | 1 |
| 50 | 0 | 1 |
| 51 | 0 | 1 |
| 52 | 1 | 1 |
| 53 | 0 | 1 |
| 54 | 0 | 1 |
| 55 | 0 | 1 |
| 56 | 0 | 1 |
| 57 |   |   |
| 58 | 0 | 1 |
| 59 | 0 | 1 |
| 60 | 0 | 1 |
| 61 | 0 | 1 |
| 62 | 0 | 1 |
| 63 |   |   |
| 64 |   |   |
| 65 | 0 | 1 |
| 66 | 0 | 1 |
| 67 |   |   |
| 68 | 0 | 1 |
| 69 | 0 | 1 |
| 70 | 0 | 1 |
| 71 | 0 | 1 |
| 72 | 0 | 1 |
| 73 | 0 | 1 |
| 74 | 0 | 1 |
| 75 | 1 | 1 |
| 76 | 0 | 1 |
| 77 | 0 | 1 |
| 78 | 0 | 1 |
| 79 | 0 | 1 |
| 80 | 0 | 1 |
| 81 | 0 | 1 |
| 82 | 0 | 1 |
| 83 | 0 | 1 |
| 84 | 0 | 1 |
| 85 | 0 | 1 |
| 86 | 0 | 1 |
| 87 | 0 | 1 |
| 88 |   | 1 |
| 89 |   | 1 |
| 90 | 0 | 1 |
| 91 | 0 | 1 |
| 92 | 0 | 1 |
| 93 | 0 | 1 |

|    | Tocilizumab (0/1) | CORTICOIDS (0/1) | Remdesivir (0/1) | VASOACTIVE DRUGS (0/1) |
|----|-------------------|------------------|------------------|------------------------|
| 1  | 0                 | 0                | 0                | 0                      |
| 2  | 0                 | 0                | 0                | 0                      |
| 3  | 0                 | 0                | 0                | 0                      |
| 4  | 0                 | 0                | 0                | 0                      |
| 5  | 0                 | 0                | 0                | 0                      |
| 6  | 0                 | 0                | 0                | 0                      |
| 7  | 0                 | 0                | 0                | 0                      |
| 8  | 0                 | 1                | 0                | 0                      |
| 9  | 0                 | 0                | 0                | 0                      |
| 10 | 0                 | 1                | 0                | 0                      |
| 11 | 0                 |                  |                  | 0                      |
| 12 | 1                 | 1                | 0                | 0                      |
| 13 | 0                 | 0                | 0                | 0                      |
| 14 | 0                 | 0                | 0                | 0                      |
| 15 | 0                 | 0                | 0                | 0                      |
| 16 |                   |                  |                  |                        |
| 17 | 0                 | 0                | 0                | 0                      |
| 18 | 0                 | 0                | 0                | 0                      |
| 19 | 0                 |                  |                  | 0                      |
| 20 | 0                 | 0                | 0                | 0                      |
| 21 | 0                 | 0                | 0                | 0                      |
| 22 | 0                 | 1                |                  | 0                      |
| 23 | 0                 | 0                | 0                | 0                      |
| 24 | 0                 | 0                | 0                | 0                      |
| 25 | 0                 | 0                | 0                | 0                      |
| 26 | 0                 | 0                | 0                | 0                      |
| 27 | 0                 | 0                | 0                | 0                      |
| 28 | 1                 | 1                | 0                | 0                      |
| 29 | 0                 | 0                | 0                | 0                      |
| 30 | 0                 | 0                | 0                | 0                      |
| 31 | 0                 | 0                | 0                | 0                      |
| 32 | 0                 | 0                | 0                | 0                      |
| 33 | 1                 | 0                | 0                | 0                      |
| 34 | 0                 | 0                | 0                | 0                      |
| 35 | 0                 | 0                | 0                | 0                      |
| 36 | 0                 | 0                | 0                | 0                      |
| 37 | 0                 | 1                | 0                | 0                      |
| 38 | 0                 | 1                | 0                | 0                      |
| 39 | 0                 | 0                | 0                | 0                      |
| 40 | 0                 | 0                | 0                | 0                      |
| 41 | 0                 | 1                | 0                | 0                      |
| 42 | 0                 | 1                | 0                | 0                      |
| 43 | 0                 | 0                | 0                | 0                      |
| 44 | 0                 | 0                | 0                | 0                      |
| 45 | 0                 | 1                | 0                | 0                      |
| 46 | 0                 | 0                | 0                | 0                      |
| 47 | 0                 | 1                | 0                | 0                      |
| 48 | 0                 | 0                | 0                | 0                      |
| 49 | 0                 | 0                | 0                | 0                      |



|    |   |   |   |   |
|----|---|---|---|---|
| 50 | 0 | 0 | 0 | 0 |
| 51 | 0 | 0 | 0 | 0 |
| 52 | 0 | 1 | 0 | 0 |
| 53 | 0 | 1 | 0 | 0 |
| 54 | 0 | 0 | 0 | 0 |
| 55 | 0 | 1 | 0 | 0 |
| 56 | 0 | 0 | 0 | 0 |
| 57 | 0 | 0 | 0 | 0 |
| 58 | 0 | 0 | 0 | 0 |
| 59 | 0 | 0 | 0 | 0 |
| 60 | 0 | 0 | 0 | 0 |
| 61 | 0 | 1 | 0 | 0 |
| 62 | 0 | 0 |   |   |
| 63 | 0 | 1 | 0 | 0 |
| 64 | 0 | 0 |   |   |
| 65 | 0 | 0 | 0 | 0 |
| 66 | 0 | 0 |   |   |
| 67 | 0 | 0 | 0 | 0 |
| 68 | 0 | 0 | 0 | 0 |
| 69 | 0 | 0 | 0 | 0 |
| 70 | 0 | 0 | 0 | 0 |
| 71 | 0 | 0 | 0 | 0 |
| 72 | 0 | 0 | 0 | 0 |
| 73 | 0 | 0 | 0 | 0 |
| 74 | 0 | 0 | 0 | 0 |
| 75 | 0 | 0 | 0 | 0 |
| 76 | 0 | 0 | 0 | 0 |
| 77 | 0 | 0 | 0 | 0 |
| 78 | 0 | 0 | 0 | 0 |
| 79 | 0 | 0 | 0 | 0 |
| 80 | 0 | 0 | 0 | 0 |
| 81 | 0 | 0 | 0 | 0 |
| 82 | 1 | 1 | 0 | 0 |
| 83 | 0 | 1 | 0 | 0 |
| 84 | 0 | 1 | 1 | 0 |
| 85 | 1 | 1 | 1 | 0 |
| 86 | 0 | 1 | 0 | 0 |
| 87 | 1 | 1 | 0 | 0 |
| 88 | 0 | 1 | 1 | 0 |
| 89 | 0 | 0 | 0 | 0 |
| 90 | 0 | 1 | 0 | 1 |
| 91 | 0 | 1 | 0 | 1 |
| 92 | 0 | 1 | 1 | 1 |
| 93 | 0 | 1 | 0 | 1 |

| PATIENT CASE N° | DETERMINATION | Group | TNF-A | IL-8   | IL-1B | IFN G  | IL-17A | P SEL     | G-CSF  | IL6    | LDH | cfDNA    |
|-----------------|---------------|-------|-------|--------|-------|--------|--------|-----------|--------|--------|-----|----------|
| 1               | 1             | Case  | 32,37 | 29,34  | 42,15 | 119,97 | 10,79  | 29194,78  | 269,35 | 147,80 | 427 | 17954,78 |
|                 | 2             | Case  | 34,83 | 43,56  | 44,03 | 116,20 | 14,95  | 38381,25  | 131,66 | 5,72   | 435 | 10426,13 |
|                 | 3             | Case  | 40,96 | 49,15  | 52,52 | 149,47 | 14,95  | 79931,17  | 126,03 | 2,53   | 348 | 10498,02 |
|                 | 4             | Case  | 42,79 | 46,72  | 59,15 | 153,09 | 22,80  | 131368,06 | 136,15 | 1,63   | 325 | 13966,13 |
| 2               | 1             | Case  | 37,84 | 35,06  | 55,23 | 130,64 | 18,48  | 83243,70  | 130,47 | 13,03  | 247 | 8111,65  |
|                 | 2             | Case  | 47,13 | 55,52  | 68,55 | 178,09 | 23,90  | 65724,66  | 150,75 | 3,49   | 175 | 8890,70  |
| 3               | 1             | Case  | 31,76 | 20,50  | 44,97 | 93,05  | 10,79  | 24599,97  | 161,75 | 14,18  |     | 24849,87 |
|                 | 2             | Case  | 38,75 | 28,52  | 58,71 | 134,40 | 14,73  | 26842,54  | 206,57 | 11,36  | 503 | 22379,83 |
|                 | 3             | Case  | 61,74 | 272,92 | 68,66 | 134,86 | 18,94  | 46560,85  | 322,72 | 453,30 |     | 55526,97 |
| 4               | 1             | Case  | 34,83 | 56,50  | 46,85 | 119,97 | 14,95  | 49253,98  | 243,55 | 4,85   | 273 | 12587,54 |
|                 | 2             | Case  | 54,62 | 285,27 | 76,97 | 206,31 | 32,56  | 101694,90 | 165,22 | 2,78   | 157 | 7008,59  |
| 5               | 1             | Case  | 20,31 | 42,11  | 38,40 | 100,87 | 6,36   | 24297,92  | 106,74 | 34,21  | 239 | 4411,73  |
|                 | 2             | Case  | 28,57 | 80,94  | 54,50 | 144,28 | 19,40  | 32160,86  | 136,15 | 52,94  | 250 | 4443,70  |
|                 | 3             | Case  | 37,07 | 398,52 | 72,76 | 182,83 | 28,28  | 56126,55  | 153,66 | 14,04  | 213 | 1607,95  |
| 6               | 1             | Case  | 38,40 | 50,02  | 56,23 | 148,52 | 19,35  | 56128,24  | 142,84 | 6,40   | 211 | 7848,16  |
|                 | 2             | Case  | 47,97 | 55,19  | 71,36 | 178,09 | 23,90  | 58484,80  | 200,91 | 21,87  | 223 |          |
| 7               | 1             | Case  | 44,63 | 41,93  | 71,36 | 173,32 | 23,90  | 72053,31  | 162,33 | <1,5   |     | 9043,73  |
|                 | 2             | Case  | 41,28 | 38,41  | 64,34 | 175,71 | 28,28  | 67189,32  | 156,55 | <1,5   | 203 | 10130,62 |
|                 | 3             | Case  | 52,96 | 39,69  | 78,37 | 215,59 | 32,56  | 92798,90  | 179,56 | <1,5   | 197 | 9735,39  |
| 9               | 1             | Case  | 24,97 | 29,82  | 44,03 | 116,20 | 10,79  | 44116,88  | 99,87  | 2,94   | 207 | 4006,98  |
|                 | 2             | Case  | 37,91 | 43,85  | 73,46 | 180,46 | 19,40  | 66682,74  | 139,08 | 5,42   | 272 | 4989,31  |
| 10              | 1             | Case  | 50,47 | 55,84  | 61,53 | 182,83 | 28,28  | 56126,55  | 146,39 | 23,16  | 254 | 7410,11  |
| 11              | 1             | Case  | 39,28 | 54,11  | 54,04 | 130,64 | 18,48  | 53046,98  | 135,34 | 168,70 | 254 | 7684,83  |
|                 | 2             | Case  | 36,06 | 42,35  | 55,35 | 134,86 | 18,94  | 50992,67  | 122,64 | <1,5   | 270 | 4643,67  |
| 12              | 1             | Case  | 39,12 | 52,82  | 53,46 | 147,66 | 22,80  | 91757,65  | 124,90 | 35,25  | 390 | 4257,12  |
|                 | 2             | Case  | 36,36 | 69,37  | 53,46 | 156,69 | 18,94  | 81582,55  | 124,90 | 57,27  | 586 | 7192,02  |
| 13              | 1             | Case  | 34,24 | 56,48  | 39,43 | 97,91  | 15,67  | 36997,58  | 118,08 | 127,60 |     | 13123,42 |
|                 | 2             | Case  | 45,35 | 61,23  | 56,40 | 126,67 | 24,16  | 74090,07  | 148,51 | 4,58   | 707 | 22759,75 |
| 14              | 1             | Case  | 40,35 | 738,36 | 53,45 | 122,66 | 24,16  | 57944,18  | 121,83 | 25,76  |     | 7940,04  |
|                 | 2             | Case  | 31,35 | 36,88  | 41,93 | 102,13 | 15,67  | 24290,30  | 120,58 | 33,57  | 211 |          |
| 15              | 1             | Case  | 35,44 | 25,27  | 42,62 | 112,40 | 10,79  | 48413,23  | 122,64 | 28,91  |     | 4258,47  |
|                 | 2             | Case  | 45,88 | 54,21  | 55,90 | 163,73 | 14,73  | 50830,41  | 136,15 | 9,61   | 258 | 8336,18  |
| 16              | 1             | Case  | 32,80 | 213,03 | 35,60 | 110,45 | 21,31  | 46475,05  | 375,35 | 160,70 |     | 3522,29  |
|                 | 2             | Case  | 32,80 | 237,13 | 36,89 | 110,45 | 18,48  | 47419,69  | 132,92 | 11,19  | 188 | 4631,13  |
| 17              | 1             | Case  | 39,43 | 35,10  | 53,46 | 154,89 | 18,94  | 73990,72  | 175,00 | 86,92  | 445 | 6290,10  |
|                 | 2             | Case  | 39,12 | 46,72  | 53,46 | 134,86 | 14,95  | 65380,64  | 133,90 | <1,5   | 389 | 20138,19 |
| 18              | 1             | Case  | 48,80 | 416,53 | 86,79 | 210,96 | 23,90  | 88280,94  | 166,66 | 39,23  | 330 | 18160,42 |
|                 | 2             | Case  | 45,46 | 81,63  | 76,97 | 175,71 | 28,28  | 62893,70  | 159,45 | 2,03   | 274 | 9735,39  |
|                 | 3             | Case  | 39,60 | 48,04  | 65,74 | 158,91 | 14,73  | 55476,85  | 156,55 | 5,85   | 229 | 4652,92  |
| 19              | 1             | Case  | 47,97 | 50,31  | 65,74 | 154,06 | 23,90  | 61113,01  | 159,45 | 3,00   | 170 | 1052,84  |
|                 | 2             | Case  | 44,63 | 45,78  | 72,06 | 185,20 | 23,90  | 68710,71  | 147,85 | < 1,5  | 159 | 5181,50  |

|    |   |      |       |        |       |        |       |           |         |        |     |          |
|----|---|------|-------|--------|-------|--------|-------|-----------|---------|--------|-----|----------|
| 20 | 1 | Case | 36,40 | 52,01  | 48,06 | 126,67 | 21,31 | 44798,19  | 2583,68 | 927,40 | 402 | 8261,25  |
|    | 2 | Case | 30,62 | 31,14  | 46,85 | 118,62 | 21,31 | 54401,74  | 128,02  | 5,97   | 324 | 14861,48 |
|    | 3 | Case | 36,40 | 77,32  | 54,04 | 134,60 | 24,16 | 72520,03  | 135,34  | 3,49   | 162 | 8120,45  |
| 21 | 1 | Case | 50,33 | 44,95  | 61,08 | 150,18 | 21,31 | 75750,99  | 140,17  | 27,91  |     | 6122,78  |
| 22 | 1 | Case | 34,83 | 34,86  | 44,50 | 100,87 | 6,36  | 20799,57  | 136,15  | 44,41  | 394 | 4789,79  |
|    | 2 | Case | 37,28 | 52,33  | 44,03 | 89,09  | 10,79 | 20211,76  | 109,02  | 51,33  | 410 | 14089,77 |
| 23 | 1 | Case | 26,21 | 56,25  | 51,57 | 131,17 | 14,95 | 58817,90  | 120,38  | 4,37   | 250 | 3833,83  |
|    | 2 | Case | 34,53 | 77,53  | 69,95 | 192,27 | 23,90 | 55495,05  | 152,21  | < 1,5  | 202 | 2942,22  |
| 24 | 1 | Case | 43,79 | 72,78  | 57,31 | 154,06 | 14,73 | 42766,54  | 170,97  | 103,50 | 421 | 9150,35  |
| 25 | 1 | Case | 42,22 | 51,52  | 54,34 | 139,98 | 19,20 | 43674,28  | 169,37  | 44,99  | 238 |          |
|    | 2 | Case | 47,13 | 48,36  | 58,71 | 192,27 | 19,40 | 44192,99  | 196,65  | 104,20 | 374 | 4627,63  |
|    | 3 | Case | 52,88 | 59,95  | 61,05 | 156,69 | 18,94 | 618539,08 | 162,86  | 449,40 | 312 | 8788,71  |
|    | 4 | Case | 31,76 | 37,03  | 41,21 | 100,87 | 1,28  | 35775,83  | 104,45  | 4,15   |     |          |
| 26 | 1 | Case | 46,54 | 43,85  | 51,24 | 145,28 | 22,86 | 62455,58  | 137,83  | 39,25  | 410 |          |
|    | 2 | Case | 47,28 | 46,24  | 56,30 | 156,31 | 23,24 | 63287,94  | 140,24  | 26,54  | 426 | 3272,35  |
|    | 3 | Case | 48,63 | 46,56  | 59,59 | 157,67 | 24,97 | 64125,57  | 149,42  | < 1,5  | 239 |          |
| 27 | 1 | Case | 39,12 | 47,45  | 47,80 | 134,86 | 10,79 | 48322,14  | 219,77  | INSUF  | 301 | 14901,08 |
|    | 2 | Case | 36,67 | 55,02  | 41,21 | 108,58 | 6,36  | 34864,50  | 184,88  | 86,94  | 371 | 27337,79 |
|    | 3 | Case | 52,88 | 59,95  | 61,05 | 156,69 | 18,94 | 618539,08 | 162,86  | 449,40 | 306 | 16335,53 |
| 28 | 1 | Case | 67,86 | 76,85  | 69,95 | 192,27 | 19,40 | 59364,14  | 159,45  | Insuf  | 147 | 22670,38 |
|    | 2 | Case | 42,53 | 77,53  | 54,50 | 134,40 | 14,73 | 35289,61  | 254,29  | 265,70 | 181 | 9000,92  |
| 29 | 1 | Case | 33,26 | 26,29  | 51,68 | 121,88 | 19,40 | 35619,89  | 121,38  | <1,5   | 133 | 2698,11  |
|    | 2 | Case | 38,32 | 35,36  | 56,32 | 132,22 | 26,61 | 48745,40  | 129,14  | <1,5   | 143 | 2838,19  |
| 30 | 1 | Case | 45,46 | 40,01  | 64,34 | 166,14 | 23,90 | 52209,41  | 153,66  | <1,5   | 224 |          |
|    | 2 | Case |       |        |       |        |       |           |         |        | 211 | 9657,08  |
|    | 3 | Case |       |        |       |        |       |           |         |        | 211 |          |
| 31 | 1 | Case | 44,02 | 49,89  | 48,74 | 134,86 | 10,79 | 71354,79  | 147,32  | 38,24  | 162 | 1908,54  |
|    | 2 | Case | 50,88 | 61,10  | 61,53 | 163,73 | 14,73 | 54476,04  | 159,45  | 33,45  | 171 | 5593,08  |
| 32 | 1 | Case | 41,57 | 53,80  | 45,91 | 131,17 | 3,96  | 47204,62  | 147,32  | 53,68  | 407 | 21618,00 |
|    | 2 | Case | 42,55 | 127,48 | 62,54 | 175,23 | 26,42 | 69474,22  | 148,90  | 83,83  | 368 |          |
|    | 3 | Case | 50,47 | 132,79 | 69,95 | 187,56 | 28,28 | 72554,97  | 150,75  | 4,87   | 321 | 7142,31  |
| 33 | 1 | Case | 57,94 | 58,80  | 68,55 | 182,83 | 23,90 | 69668,40  | 153,66  | 10,26  | 166 | 1906,50  |
|    | 2 | Case | 60,42 | 168,27 | 69,95 | 187,56 | 19,40 | 65767,90  | 127,31  | 17,76  | 163 | 8210,53  |
|    | 3 | Case | 53,79 | 102,29 | 74,16 | 182,83 | 23,90 | 69142,23  | 139,08  | 2,99   | 260 | 3284,85  |
|    | 4 | Case | 66,21 | 304,51 | 85,39 | 210,96 | 28,28 | 116107,83 | 158,00  | 2,66   | 170 | 7446,34  |
| 34 | 1 | Case | 34,24 | 26,68  | 46,85 | 114,55 | 15,67 | 58060,15  | 120,58  | 6,33   | 132 | 2796,27  |
|    | 2 | Case | 40,44 | 51,61  | 61,53 | 168,54 | 23,90 | 52942,90  | 150,75  | <1,5   | 136 | 4446,77  |
| 35 | 1 | Case | 36,06 | 28,38  | 52,04 | 145,84 | 14,95 | 69523,08  | 118,12  | 5,60   | 208 | 4353,92  |
|    | 2 | Case |       |        |       |        |       |           |         |        | 169 |          |
| 36 | 1 | Case | 29,91 | 31,74  | 47,80 | 119,97 | 8,62  | 44148,78  | 118,12  | 28,70  | 356 | 20093,26 |
|    | 2 | Case | 40,96 | 90,07  | 62,95 | 178,02 | 18,94 | 160857,23 | 140,62  | 36,59  |     | 10014,11 |
| 37 | 1 | Case | 37,84 | 33,76  | 56,40 | 146,32 | 24,16 | 63962,54  | 148,51  | 78,17  | 175 | 4226,32  |
|    | 2 | Case | 46,93 | 42,51  | 66,69 | 179,26 | 28,25 | 68689,74  | 158,26  | 4,23   | 168 | 3300,47  |

|    |   |      |       |        |       |          |        |           |        |        |     |          |
|----|---|------|-------|--------|-------|----------|--------|-----------|--------|--------|-----|----------|
| 38 | 1 | Case | 28,99 | 33,66  | 43,09 | 266,62   | 10,79  | 38953,27  | 99,87  | 58,54  | 557 | 18794,25 |
|    | 2 | Case | 41,70 | 83,01  | 66,44 | 391,13   | 23,90  | 58561,58  | 142,01 | 2,17   | 167 | 2051,09  |
| 39 | 1 | Case | 46,46 | 119,28 | 25,37 | 96,98    | 6,36   | 27030,03  | 495,97 | 161,10 | 167 | 7937,48  |
|    | 2 | Case | 31,76 | 110,03 | 32,80 | 140,37   | 14,95  | 43454,51  | 118,12 | 4,96   | 146 | 5444,58  |
| 40 | 1 | Case | 35,44 | 77,89  | 40,28 | 134,86   | 14,95  | 75279,56  | 102,16 | <1,5   | 167 | 10807,12 |
|    | 2 | Case |       |        |       |          |        |           |        |        | 146 |          |
| 41 | 1 | Case | 27,72 | 39,37  | 64,34 | 141,82   | 19,40  | 29240,97  | 243,11 | <1,5   | 150 | 8346,69  |
|    | 2 | Case | 36,22 | 66,41  | 74,16 | 208,64   | 19,40  | 53580,88  | 153,66 | < 1,5  | 206 | 6286,99  |
| 42 | 1 | Case | 36,06 | 27,18  | 43,09 | 188,53   | 14,95  | 59040,55  | 120,38 | <1,5   | 281 | 686,42   |
|    | 2 | Case |       |        |       |          |        |           |        |        | 167 |          |
| 43 | 1 | Case | 28,68 | 19,30  | 40,28 | 98,93    | 12,89  | 28810,38  | 109,02 | 39,39  | 232 | 4036,78  |
|    | 2 | Case |       |        |       |          |        |           |        |        | 254 |          |
| 44 | 1 | Case | 35,14 | 56,74  | 41,21 | 96,98    | 6,36   | 32887,09  | 102,16 | 58,79  | 306 | 6866,42  |
|    | 2 | Case | 44,63 | 81,97  | 58,01 | 144,28   | 19,40  | 44273,51  | 136,15 | 29,47  | 320 | 6886,19  |
|    | 3 | Case | 50,88 | 65,74  | 72,76 | 178,09   | 23,90  | 70640,16  | 147,85 | < 1,5  | 199 | 3405,09  |
| 45 | 1 | Case | 53,79 | 145,41 | 79,08 | 182,83   | 28,28  | 72819,23  | 153,66 | 10,06  | 224 | 7057,69  |
|    | 2 | Case | 49,62 | 104,84 | 51,66 | 122,66   | 18,48  | 51576,01  | 124,32 | 25,30  | 281 | 22830,15 |
|    | 3 | Case | 49,63 | 107,31 | 68,55 | 196,97   | 23,90  | 56384,84  | 134,68 | 36,56  | 300 | 8628,74  |
| 46 | 1 | Case | 41,93 | 102,13 | 15,67 | 24290,30 | 120,58 | 33,57     | 0,943  | 0,804  | 255 | 5427,56  |
|    | 2 | Case |       |        |       |          |        |           |        |        | 269 |          |
| 47 | 1 | Case | 42,53 | 42,57  | 65,74 | 168,54   | 19,40  | 47829,25  | 153,66 | 3,40   | 417 | 14108,31 |
|    | 2 | Case | 44,28 | 298,74 | 72,54 | 173,00   | 24,16  | 94710,05  | 142,57 | 4,26   | 513 | 20203,26 |
| 48 | 1 | Case | 27,44 | 19,54  | 35,60 | 93,05    | 6,36   | 27283,23  | 102,16 | 6,04   | 178 | 5706,50  |
|    | 2 | Case |       |        |       |          |        |           |        |        | 174 |          |
| 49 | 1 | Case | 47,13 | 113,85 | 50,27 | 134,40   | 19,40  | 35469,43  | 227,70 | 110,30 | 260 | 9560,83  |
|    | 2 | Case | 29,91 | 27,42  | 39,34 | 93,05    | 10,79  | 30851,33  | 106,74 | 14,21  | 239 | 3120,06  |
|    | 3 | Case | 41,28 | 40,65  | 60,12 | 139,36   | 19,40  | 47797,75  | 133,21 | 22,92  | 257 | 1484,92  |
| 50 | 1 | Case | 39,43 | 66,88  | 48,74 | 138,54   | 10,79  | 69037,47  | 132,78 | 135,60 | 353 | 13694,12 |
|    | 2 | Case | 55,45 | 65,08  | 81,18 | 215,59   | 32,56  | 102359,14 | 183,85 | 32,21  | 194 | 7525,38  |
| 51 | 1 | Case | 39,60 | 50,31  | 58,71 | 163,73   | 19,40  | 45280,39  | 144,93 | 22,03  | 151 | 1797,81  |
|    | 2 | Case | 37,84 | 42,09  | 51,66 | 122,66   | 18,48  | 69157,08  | 152,06 | 34,12  | 219 | 9101,68  |
|    | 3 | Case | 40,44 | 126,03 | 55,90 | 168,54   | 19,40  | 65422,83  | 153,66 | 15,73  | 182 | 9759,76  |
| 52 | 1 | Case | 26,21 | 58,22  | 36,53 | 72,90    | 6,36   | 18364,57  | 109,02 | 31,73  | 248 | 7867,32  |
|    | 2 | Case | 36,22 | 42,25  | 53,09 | 129,42   | 14,73  | 31167,56  | 136,15 | 33,14  | 191 | 5524,36  |
|    | 3 | Case | 37,91 | 47,07  | 60,82 | 149,18   | 19,40  | 41748,89  | 130,26 | 45,74  | 185 | 7133,45  |
|    | 4 | Case | 32,99 | 40,65  | 44,97 | 123,72   | 10,79  | 41622,44  | 131,66 | 21,38  | 261 | 39732,40 |
| 53 | 1 | Case | 60,42 | 151,63 | 86,09 | 215,59   | 36,78  | 92391,84  | 196,65 | 3,70   | 349 | 6109,04  |
|    | 2 | Case | 42,18 | 45,50  | 54,41 | 145,84   | 22,80  | 80181,32  | 131,66 | 24,56  | 316 | 21230,63 |
|    | 3 | Case | 63,53 | 83,91  | 67,23 | 179,26   | 34,79  | 90098,39  | 153,21 | < 1,5  | 257 | 19706,04 |
| 54 | 1 | Case | 25,90 | 48,18  | 34,20 | 85,10    | 6,36   | 29412,92  | 97,57  | 5,83   | 326 | 11245,39 |
|    | 2 | Case | 35,38 | 52,26  | 47,46 | 129,42   | 19,40  | 35229,84  | 115,41 | 4,96   | 345 | 1348,31  |
|    | 3 | Case | 42,12 | 53,56  | 54,50 | 149,18   | 19,40  | 49324,17  | 136,15 | 13,06  | 315 | 2594,86  |
|    | 1 | Case | 25,59 | 42,35  | 40,28 | 119,97   | 1,28   | 24706,75  | 95,27  | 44,14  | 281 | 2699,46  |

|    |   |      |        |        |        |        |       |           |         |        |      |          |
|----|---|------|--------|--------|--------|--------|-------|-----------|---------|--------|------|----------|
| 56 | 2 | Case | 50,00  | 94,36  | 69,42  | 177,47 | 34,79 | 99414,91  | 146,89  | 21,54  | 201  | 10893,40 |
|    | 3 | Case | 42,12  | 36,81  | 64,34  | 168,54 | 19,40 | 57026,42  | 144,93  | < 1,5  | 286  | 4487,38  |
| 57 | 1 | Case | 23,28  | 43,39  | 38,16  | 89,32  | 15,67 | 35633,56  | 132,92  | 61,54  | 329  | 4776,33  |
|    | 2 | Case | 36,22  | 84,04  | 64,34  | 173,32 | 19,40 | 52441,32  | 136,15  | 5,52   | 288  | 17224,81 |
| 58 | 1 | Case | 29,91  | 33,18  | 38,40  | 123,72 | 10,79 | 31771,89  | 158,43  | 63,78  | 300  | 16248,68 |
| 59 | 1 | Case | 50,43  | 190,10 | 53,46  | 142,20 | 18,94 | 72863,36  | 1529,22 | 215,00 | 219  | 20747,29 |
| 60 | 1 | Case | 43,57  | 77,32  | 58,75  | 157,86 | 18,48 | 68717,51  | 140,17  | 35,95  | 372  | 4089,91  |
|    | 2 | Case | 224,32 | 709,07 | 122,55 | 192,27 | 23,90 | 55704,76  | 168,10  | 11,94  | 221  | 9700,41  |
| 61 | 1 | Case | 37,28  | 112,39 | 52,52  | 160,28 | 22,80 | 230790,81 | 149,55  | 41,21  | 174  | 18011,99 |
| 62 | 1 | Case | 42,12  | 26,12  | 51,97  | 124,89 | 21,69 | 42417,90  | 129,14  | <1,5   | 187  | 1145,28  |
| 63 | 1 | Case | 32,84  | 68,08  | 67,15  | 168,54 | 19,40 | 54726,80  | 193,81  | 71,74  | 371  | 6670,67  |
|    | 2 | Case | 21,25  | 32,46  | 44,97  | 118,09 | 14,95 | 41828,86  | 120,38  | 4,59   |      | 7502,51  |
|    | 3 | Case | 34,14  | 104,92 | 65,59  | 154,06 | 31,52 | 53399,04  | 808,99  | 361,20 | 388  | 10312,61 |
| 64 | 1 | Case | 23,11  | 27,66  | 38,87  | 112,40 | 6,36  | 32180,78  | 106,74  | 26,06  | 272  | 2764,61  |
|    | 2 | Case | 26,86  | 55,84  | 53,79  | 149,18 | 14,73 | 47734,81  | 118,40  | 11,14  | 191  | 5615,10  |
|    | 3 | Case | 29,21  | 40,21  | 49,80  | 128,56 | 21,69 | 44076,47  | 108,77  | 10,53  | 173  | 4621,68  |
|    | 4 | Case | 24,35  | 58,71  | 45,91  | 116,20 | 6,36  | 47495,91  | 99,87   | 10,53  | 173  | 14396,55 |
| 65 | 1 | Case | 42,18  | 36,55  | 54,41  | 142,20 | 16,96 | 82717,89  | 111,30  | <1,5   | 169  | 31463,29 |
|    | 2 | Case | 41,26  | 48,91  | 52,52  | 142,20 | 14,95 | 79868,85  | 120,38  | 3,86   | 132  | 14995,22 |
| 66 | 1 | Case | 47,68  | 56,01  | 61,05  | 179,78 | 22,80 | 122312,20 | 143,97  | 29,31  |      | 22764,15 |
|    | 2 | Case | 62,49  | 128,28 | 82,58  | 215,59 | 23,90 | 105792,54 | 185,27  | 41,22  | 391  | 14157,58 |
|    | 3 | Case | 60,42  | 474,31 | 88,19  | 220,21 | 32,56 | 111157,09 | 196,65  | < 1,5  | 345  | 17112,36 |
| 67 | 1 | Case | 38,51  | 29,58  | 50,63  | 131,17 | 10,79 | 71491,25  | 104,45  | 2,88   | 1025 | 2797,59  |
|    | 2 | Case | 36,67  | 42,83  | 47,80  | 116,20 | 10,79 | 48104,57  | 97,57   | 5,21   | 441  | 14476,06 |
|    | 3 | Case | 31,45  | 34,14  | 44,97  | 112,40 | 8,62  | 41308,15  | 90,64   | 4,28   |      | 1258,58  |
| 68 | 1 | Case | 47,13  | 124,91 | 69,95  | 187,56 | 19,40 | 73740,03  | 147,85  | <1,5   | 194  | 7196,02  |
| 69 | 1 | Case | 42,47  | 54,17  | 53,06  | 139,53 | 28,25 | 34070,65  | 134,22  | 50,84  | 316  | 2847,56  |
|    | 2 | Case | 47,97  | 441,63 | 68,55  | 182,83 | 23,90 | 54431,38  | 142,01  | 27,95  | 430  | NO FOUND |
|    | 3 | Case | 31,14  | 52,82  | 43,09  | 119,97 | 18,94 | 36967,31  | 122,64  | 83,55  | 370  | 9022,56  |
| 70 | 1 | Case | 29,91  | 29,34  | 43,09  | 119,97 | 10,79 | 41359,09  | 131,66  | 37,53  | 346  | 4242,57  |
|    | 2 | Case | 54,62  | 115,67 | 76,97  | 206,31 | 23,90 | 97695,01  | 173,84  | 2,84   | 226  | 5977,39  |
| 71 | 1 | Case | 39,43  | 35,10  | 50,63  | 131,17 | 14,95 | 59090,21  | 122,64  | 6,87   | 232  | 13320,82 |
| 72 | 1 | Case | 30,53  | 30,78  | 47,80  | 123,72 | 6,36  | 25227,36  | 113,58  | 8,40   | 223  | 5277,95  |
|    | 2 | Case | 42,12  | 44,50  | 65,74  | 163,73 | 23,90 | 33101,01  | 147,85  | 6,76   | 197  | 1590,32  |
|    | 3 | Case | 34,83  | 37,27  | 59,15  | 167,41 | 14,95 | 40257,93  | 129,41  | 4,14   | 210  | 5251,55  |
| 73 | 1 | Case | 26,23  | 45,22  | 52,86  | 122,66 | 18,48 | 64638,76  | 123,08  | 5,94   | 185  | 7068,81  |
|    | 2 | Case | 40,86  | 264,62 | 74,87  | 201,65 | 19,40 | 80065,18  | 170,97  | 33,72  | 258  | 12046,13 |
|    | 3 | Case | 38,75  | 91,68  | 74,87  | 192,27 | 23,90 | 82174,26  | 168,10  | 9,59   | 168  | 3537,85  |
| 74 | 1 | Case | 40,44  | 126,03 | 55,90  | 168,54 | 19,40 | 65422,83  | 153,66  | 15,73  | 161  | 8616,58  |
|    | 2 | Case | 40,02  | 221,47 | 75,57  | 192,27 | 28,28 | 78118,64  | 150,75  | < 1,5  |      |          |
| 75 | 1 | Case | 29,91  | 24,79  | 43,09  | 116,20 | 10,79 | 39653,37  | 113,58  | 19,01  | 406  | 3480,40  |
|    | 2 | Case | 35,54  | 31,97  | 47,63  | 113,83 | 24,97 | 34945,54  | 136,76  | 16,46  | 300  | 6136,85  |
|    | 3 | Case | 47,97  | 66,08  | 68,55  | 178,09 | 23,90 | 73959,93  | 156,55  | <1,5   | 227  | 1863,68  |

|    |   |      |       |        |       |        |       |           |        |         |     |            |
|----|---|------|-------|--------|-------|--------|-------|-----------|--------|---------|-----|------------|
| 76 | 1 | Case | 31,76 | 35,59  | 43,09 | 116,20 | 10,79 | 31420,41  | 120,38 | 38,76   | 189 | 3539,35    |
|    | 2 | Case | 51,30 | 70,43  | 75,57 | 173,32 | 32,56 | 67299,98  | 178,13 | 26,53   | 190 | 6547,18    |
|    | 3 | Case | 52,13 | 107,67 | 75,57 | 182,83 | 23,90 | 76476,44  | 159,45 | 3,10    | 199 | 5158,92    |
| 77 | 1 | Case | 38,9  | 424,58 | 49,97 | 134,97 | 33,95 | 52346,56  | 124,94 | 8,23    | 223 |            |
|    | 2 | Case | 40,40 | 502,89 | 58,50 | 154,06 | 34,79 | 50203,00  | 131,68 | 52,93   | 235 | 10931,05   |
|    | 3 | Case | 45,85 | 396,87 | 64,85 | 200,68 | 46,27 | 41038,97  | 147,32 | 44,79   | 220 | 17780,40   |
| 78 | 1 | Case |       |        |       |        |       |           |        | 65,36   | 484 |            |
| 79 | 1 | Case | 34,83 | 35,59  | 43,09 | 127,45 | 10,79 | 39812,00  | 106,74 | 7,98    | 210 | 5991,80    |
|    | 2 | Case | 36,22 | 40,01  | 60,12 | 149,18 | 19,40 | 53099,52  | 190,97 | < 1,5   | 178 | 1748,41    |
| 80 | 1 | Case | 50,00 | 148,98 | 65,05 | 161,29 | 38,06 | 56600,43  | 159,53 | 98,75   | 323 | 22047,41   |
|    | 2 | Case | 55,43 | 115,25 | 67,23 | 164,89 | 39,69 | 80099,96  | 162,05 | 52,49   | 201 | NO FOUND   |
|    | 3 | Case | 66,89 | 858,41 | 83,69 | 189,99 | 44,57 | 136345,55 | 157,00 | 33,33   | 255 | 34241,36   |
| 81 | 1 | Case | 34,83 | 30,54  | 43,09 | 116,20 | 10,79 | 37794,43  | 153,99 | 27,27   | 364 | 10014,11   |
|    | 2 | Case | 52,38 | 101,80 | 63,95 | 154,06 | 31,52 | 54896,46  | 182,19 | 22,00   | 289 | 11451,36   |
| 82 | 1 | Case | 38,51 | 54,29  | 43,09 | 116,20 | 6,36  | 34876,15  | 165,07 | 62,09   |     | 32824,33   |
|    | 2 | Case | 35,44 | 55,02  | 50,16 | 142,20 | 6,36  | 52217,69  | 121,51 | 538,40  |     | 43263,61   |
|    | 3 | Case | 36,27 | 56,34  | 53,96 | 146,24 | 6,42  | 52462,98  | 126,34 | 434,77  |     |            |
| 83 | 1 | Case | 48,91 | 143,91 | 58,20 | 149,47 | 22,80 | 101510,96 | 256,47 | 188,00  | 446 | 56354,82   |
|    | 2 | Case | 38,51 | 69,12  | 57,25 | 138,54 | 18,94 | 88375,78  | 131,66 | 24,60   |     | 6613,86    |
| 84 | 1 | Case | 55,43 | 65,45  | 73,80 | 179,26 | 31,52 | 96694,48  | 188,48 | 21,37   | 358 | 14875,97   |
|    | 2 | Case | 36,98 | 89,56  | 50,63 | 138,54 | 14,95 | 62702,13  | 162,86 | 152,90  | 461 | 36065,06   |
|    | 3 | Case | 40,96 | 49,89  | 56,30 | 163,85 | 14,95 | 130150,75 | 149,55 | 2,17    | 502 | 11557,55   |
| 85 | 1 | Case | 47,84 | 34,54  | 62,24 | 142,43 | 24,16 | 98625,27  | 142,57 | 134,10  |     | 51048,31   |
|    | 2 | Case | 56,78 | 130,43 | 71,61 | 189,99 | 34,79 | 102035,00 | 151,95 | 134,10  | 420 | 16023,12   |
| 86 | 1 | Case | 52,72 | 54,75  | 56,32 | 148,62 | 21,69 | 38857,79  | 113,87 | 470,40  | 527 | 14969,67   |
| 87 | 1 | Case | 24,76 | 22,68  | 31,68 | 75,99  | 12,89 | 29906,91  | 137,76 | 37,17   | 286 | 4446,32    |
|    | 2 | Case | 40,71 | 33,49  | 51,66 | 140,48 | 18,48 | 68375,13  | 222,13 | 683,60  | 414 | 19266,03   |
|    | 3 | Case | 53,79 | 94,84  | 68,55 | 194,62 | 23,90 | 79613,38  | 196,65 | 6705,00 | 319 | 12564,62   |
| 88 | 1 | Case | 45,21 | 93,13  | 48,72 | 121,21 | 21,69 | 34884,44  | 121,52 | 60,86   | 355 | 28413,00   |
|    | 2 | Case | 39,73 | 114,77 | 57,25 | 147,66 | 26,58 | 67213,06  | 122,64 | 6,29    |     | 38380,72   |
|    | 3 | Case | 36,67 | 72,12  | 47,80 | 116,20 | 14,95 | 47897,42  | 114,71 | 5,27    |     | 58618,53   |
| 89 | 1 | Case | 33,29 | 53,06  | 46,85 | 127,45 | 10,79 | 54141,90  | 160,65 | 491,70  | 510 | 20682,58   |
|    | 2 | Case | 38,51 | 50,37  | 53,46 | 138,54 | 10,79 | 84913,70  | 131,66 | 483,57  | 292 | 17731,33   |
| 90 | 1 | Case | 53,79 | 88,89  | 86,79 | 215,59 | 23,90 | 103311,64 | 165,22 | 6,48    | 486 | 6262,87    |
|    | 2 | Case | 48,63 | 79,03  | 69,42 | 157,67 | 28,25 | 79881,34  | 148,16 | 19,46   | 327 | 5546,23    |
|    | 3 | Case |       |        |       |        |       |           |        |         | 243 |            |
| 91 | 1 | Case | 39,38 | 52,43  | 59,42 | 160,34 | 24,64 | 45782,22  | 172,48 | 525,70  | 271 |            |
|    | 2 | Case | 40,74 | 50,35  | 56,32 | 128,56 | 28,25 | 46836,01  | 151,95 | 442,50  | 400 | 3915,78    |
|    | 3 | Case |       |        |       |        |       |           |        |         | 293 |            |
| 92 | 1 | Case | 43,16 | 83,91  | 53,60 | 132,22 | 24,97 | 44417,66  | 188,48 | 418,00  | 413 | 523,71815  |
|    | 2 | Case | 48,20 | 81,96  | 67,99 | 161,66 | 24,16 | 106891,13 | 154,41 | 175,20  | 325 | 7548,42945 |
|    | 3 | Case |       |        |       |        |       |           |        |         | 229 |            |
|    | 1 | Case | 55,43 | 41,36  | 73,80 | 193,56 | 38,06 | 147691,46 | 155,74 | 59,48   | 556 | 15088,59   |

|    |   |      |       |        |       |        |       |          |        |        |     |          |
|----|---|------|-------|--------|-------|--------|-------|----------|--------|--------|-----|----------|
| 93 | 2 | Case | 43,84 | 99,32  | 53,06 | 128,56 | 24,97 | 44498,42 | 149,42 | 152,80 | 401 | 24618,01 |
|    | 3 | Case | 45,90 | 75,08  | 56,86 | 124,89 | 28,25 | 49780,77 | 139,29 | 5,06   | 328 | 14311,46 |
| 94 | 1 | Caso | 32,99 | 23,36  | 52,52 | 134,86 | 10,79 | 60599,19 | 122,64 | 8,27   |     |          |
|    | 2 | Caso | 38,75 | 57,15  | 65,74 | 163,73 | 14,73 | 62215,98 | 156,55 | 3,69   |     |          |
| 95 | 1 | Caso | 40,40 | 502,89 | 58,50 | 154,06 | 34,79 | 50203,00 | 131,68 | 64,22  |     |          |

**TABLE 7 CONTROL GROUP**

**BASECYTOMETRY**

| CASE Nº | TNF-A | IL-8   | IL-1B | IFN G  | IL-17A | P SEL     | G-CSF  | IL6          | Cf DNA  |
|---------|-------|--------|-------|--------|--------|-----------|--------|--------------|---------|
| 1       | 53,53 | 299,88 | 64,54 | 138,53 | 18,48  | 77570,23  | 135,34 | 19,29        | 3778,19 |
| 2       | 36,76 | 43,65  | 59,91 | 134,60 | 15,67  | 76635,09  | 148,51 | 6,51         | 5864,92 |
| 3       | 57,78 | 99,74  | 55,23 | 130,64 | 18,48  | 60299,90  | 118,08 | 5,10         | 1735,02 |
| 4       | 38,56 | 49,65  | 54,04 | 130,64 | 21,31  | 71508,79  | 132,92 | insuficiente | 8971,07 |
| 5       | 41,07 | 311,34 | 54,04 | 122,66 | 18,48  | 61021,71  | 123,08 | 10,56        | 3537,46 |
| 6       | 49,27 | 78,41  | 58,75 | 134,60 | 21,31  | 82205,50  | 141,37 | 7,05         | 3172,35 |
| 7       | 43,92 | 84,97  | 67,99 | 154,03 | 21,31  | 100133,44 | 130,47 | 5,41         | 4767,31 |
| 8       | 47,84 | 127,18 | 65,69 | 146,32 | 24,16  | 86833,56  | 134,13 | 8,89         | 2449,06 |
| 9       | 66,28 | 120,12 | 65,69 | 142,43 | 24,16  | 72539,98  | 152,06 | 5,98         | 1393,93 |
| 10      | 37,84 | 63,36  | 56,40 | 126,67 | 21,31  | 80151,77  | 128,02 | 21,55        | 3748,14 |
| 11      | 39,28 | 44,69  | 61,08 | 138,53 | 21,31  | 79103,99  | 140,17 | 10,30        | 3370,18 |
| 12      | 39,28 | 31,40  | 63,39 | 138,53 | 21,31  | 94021,12  | 144,95 | 3,60         | 1728,33 |
| 13      | 60,62 | 141,55 | 65,69 | 150,18 | 27,03  | 101088,11 | 140,17 | 10,62        | 1903,21 |
| 14      | 32,07 | 32,71  | 43,17 | 93,64  | 15,67  | 40052,00  | 106,58 | 7,83         | 621,45  |
| 15      | 42,85 | 175,18 | 65,69 | 142,43 | 21,31  | 80554,57  | 154,41 | 8,58         | 6362,27 |
| 16      | 42,14 | 40,53  | 52,86 | 134,60 | 21,31  | 67619,41  | 147,33 | 5,17         | 2410,52 |
| 17      | 39,99 | 46,00  | 51,66 | 114,55 | 18,48  | 63407,96  | 113,01 | 7,45         | 1694,89 |
| 18      | 32,80 | 28,52  | 58,75 | 130,64 | 29,92  | 74425,87  | 132,92 | 3,50         | 1487,56 |
| 19      | 42,85 | 52,01  | 59,33 | 126,67 | 24,16  | 77338,17  | 130,47 | 9,84         | 3162,93 |
| 20      | 42,50 | 149,17 | 62,24 | 142,43 | 24,16  | 80445,53  | 120,58 | 12,81        | 2561,00 |
| 21      | 39,99 | 57,27  | 59,91 | 134,60 | 27,03  | 79146,96  | 128,02 | 12,43        | 2499,35 |
| 22      | 32,07 | 50,18  | 38,16 | 110,45 | 18,48  | 24212,35  | 72,07  | 9,75         | 598,04  |
| 23      | 44,99 | 54,11  | 61,08 | 142,43 | 18,48  | 98235,18  | 132,92 | 9,53         | 1648,08 |
| 24      | 38,92 | 54,64  | 54,04 | 114,55 | 18,48  | 58902,43  | 130,47 | 8,06         | 2932,19 |
| 25      | 39,99 | 124,82 | 57,58 | 134,60 | 21,31  | 72320,80  | 110,45 | 13,16        | 1662,78 |
| 26      | 38,56 | 36,36  | 51,66 | 130,64 | 18,48  | 67487,89  | 128,02 | 6,36         | 2584,41 |
| 27      | 44,28 | 35,58  | 61,08 | 157,86 | 21,31  | 97898,21  | 119,33 | 11,10        | 1497,03 |
| 28      | 41,42 | 54,90  | 62,24 | 142,43 | 24,16  | 100173,05 | 154,41 | 3,80         | 3256,56 |
| 29      | 54,95 | 151,01 | 61,66 | 142,43 | 21,31  | 79556,21  | 130,47 | 6,64         | 4847,68 |
| 30      | 39,99 | 52,01  | 54,04 | 122,66 | 21,31  | 71135,11  | 118,08 | 7,20         | 3397,01 |
| 31      | 38,56 | 128,66 | 56,40 | 146,32 | 21,31  | 87312,10  | 144,95 | 11,33        | 832,13  |
| 32      | 40,35 | 84,42  | 61,66 | 148,25 | 21,31  | 79018,10  | 132,92 | 4,76         | 9230,71 |
| 33      | 38,56 | 47,56  | 59,91 | 136,57 | 18,48  | 80293,09  | 131,70 | 6,61         | 7014,88 |
| 34      | 41,42 | 38,45  | 56,40 | 130,64 | 21,31  | 74558,51  | 118,08 | 3,96         | 4251,55 |
| 35      | 42,14 | 42,87  | 62,24 | 138,53 | 18,48  | 89154,04  | 130,47 | 3,63         | 2898,75 |
| 36      | 32,07 | 29,31  | 50,47 | 118,62 | 18,48  | 61820,39  | 107,88 | 3,83         | 2370,39 |
| 37      | 96,80 | 226,36 | 72,54 | 154,03 | 29,92  | 83142,73  | 144,95 | 8,15         | 3685,46 |
| 38      | 39,99 | 83,05  | 52,26 | 130,64 | 15,67  | 63087,78  | 130,47 | 10,37        | 2857,07 |
| 39      | 36,76 | 50,44  | 58,75 | 270,74 | 18,48  | 77433,03  | 132,92 | 4,52         | 3524,09 |
| 40      | 41,07 | 37,14  | 57,58 | 132,62 | 21,31  | 80707,44  | 135,34 | 6,38         | 1234,61 |
| 41      | 44,99 | 56,21  | 59,91 | 154,03 | 21,31  | 81475,53  | 137,76 | 15,44        | 2487,43 |
| 42      | 46,42 | 229,82 | 71,40 | 138,53 | 21,31  | 87241,93  | 135,34 | 12,51        | 5356,63 |
| 43      | 36,04 | 25,88  | 51,66 | 114,55 | 18,48  | 55639,89  | 128,02 | 3,65         | 9635,51 |
| 44      | 41,78 | 87,73  | 62,81 | 142,43 | 24,16  | 96970,41  | 140,17 | 7,78         | 1330,39 |
| 45      | 34,24 | 49,92  | 49,27 | 118,62 | 18,48  | 61021,71  | 120,58 | 5,35         | 3704,67 |
| 46      | 31,35 | 28,78  | 46,85 | 102,13 | 18,48  | 56065,69  | 120,58 | 5,42         | 1812,31 |
| 47      | 42,85 | 93,56  | 61,08 | 142,43 | 27,03  | 95087,71  | 135,34 | 3,27         | 1778,49 |
| 48      | 52,82 | 71,91  | 71,40 | 152,11 | 21,31  | 98157,32  | 170,65 | 4,21         | 1002,47 |
| 49      | 57,07 | 115,75 | 61,66 | 130,64 | 21,31  | 70140,22  | 144,95 | 7,22         | 2351,14 |
| 50      | 34,96 | 28,78  | 50,47 | 114,55 | 14,27  | 63052,29  | 129,25 | 4,92         | 2189,42 |
| 51      | 38,56 | 31,14  | 54,64 | 130,64 | 21,31  | 66638,16  | 130,47 | 9,19         | 823,19  |



|    |       |        |       |        |       |          |        |       |         |
|----|-------|--------|-------|--------|-------|----------|--------|-------|---------|
| 52 | 45,71 | 71,11  | 61,08 | 146,32 | 24,16 | 98066,56 | 137,76 | 9,14  | 2728,20 |
| 53 | 39,28 | 74,07  | 51,66 | 134,60 | 18,48 | 72340,70 | 128,02 | 11,17 | 1633,13 |
| 54 | 44,99 | 68,96  | 59,91 | 126,67 | 19,89 | 77443,58 | 114,28 | 10,21 | 1731,68 |
| 55 | 49,27 | 144,89 | 64,54 | 134,60 | 18,48 | 68755,64 | 125,56 | 16,42 | 2770,52 |
